# Supplementary material
Source: PubMed Central journal article supplement (PMC7494202)
Supplement: NIHMS1562642-supplement-AAAI_Supplementary.pdf [file NIHMS1562642-supplement-AAAI_Supplementary.pdf]

# Supplementary Material for “Generative-Discriminative Complementary Learning”

September 6, 2019

## S1. Proof of Theorem 1

According to the triangle inequality of total variation (TV) distance, we have

$$d_{TV}(P_{XY}, Q_{XY}) \leq d_{TV}(P_{XY}, P_{Y|X}Q_X) + d_{TV}(P_{Y|X}Q_X, Q_{XY}). \quad (1)$$

Using the definition of TV distance, we have

$$\begin{aligned} d_{TV}(P_{Y|X}P_X, P_{Y|X}Q_X) &= \frac{1}{2} \int |p_{Y|X}(y|x)p_X(x) - p_{Y|X}(y|x)q_X(x)|\mu(x, y) \\ &\stackrel{(a)}{\leq} \frac{1}{2} \int |p_{Y|X}(y|x)|\mu(x, y) \int |p_X(x) - q_X(x)|\mu(x) \\ &\leq c_1 d_{TV}(P_X, Q_X), \end{aligned} \quad (2)$$

where  $p$  and  $q$  are densities,  $\mu$  is a ( $\sigma$ -finite) measure,  $c_1$  is a constant, and (a) follows from the Hölder inequality.

Similarly, we have

$$d_{TV}(P_{Y|X}Q_X, Q_{Y|X}Q_X) \leq c_2 d_{TV}(P_{Y|X}, Q_{Y|X}), \quad (3)$$

where  $c_2$  is a constant. Combining (1), (2), and (3), we have

$$\begin{aligned} d_{TV}(P_{XY}, Q_{XY}) &\leq c_1 d_{TV}(P_X, Q_X) + c_2 d_{TV}(P_{Y|X}, Q_{Y|X}) \\ &\leq c_1 d_{TV}(P_X, Q_X) + c_2 d_{TV}(P_{Y|X}, Q'_{Y|X}) + c_2 d_{TV}(Q'_{Y|X}, Q_{Y|X}). \end{aligned} \quad (4)$$

Since we have no access to  $P_{Y|X}$ , by simply adapting the proof of Theorem 1 in [Thekumparampil et al.2018], we bound  $d_{TV}(P_{Y|X}, Q'_{Y|X})$  using complementary conditional probabilities as

$$d_{TV}(P_{Y|X}, Q'_{Y|X}) = \max_{S_1, \dots, S_K \subseteq \mathcal{X}} \sum_{y \in \mathcal{Y}} \{P(y|S_y) - Q'(y|S_y)\}$$

$$\begin{aligned}
&= \max_{S_1, \dots, S_K \subseteq \mathcal{X}} \langle \mathbf{1}, P(\cdot|\{S_y\}_{y \in \mathcal{Y}}) - Q'(\cdot|\{S_y\}_{y \in \mathcal{Y}}) \rangle \\
&\stackrel{(a)}{=} \max_{S_1, \dots, S_K \subseteq \mathcal{X}} \langle \mathbf{1}, \mathbf{M}^{-1}(P(\cdot|\{S_{\bar{y}}\}_{\bar{y} \in \mathcal{Y}}) - Q'(\cdot|\{S_{\bar{y}}\}_{\bar{y} \in \mathcal{Y}})) \rangle \\
&\stackrel{(b)}{\leq} \|\mathbf{M}^{-\top}\|_1 \max_{S_1, \dots, S_K \subseteq \mathcal{X}} \|P(\cdot|\{S_{\bar{y}}\}_{\bar{y} \in \mathcal{Y}}) - Q'(\cdot|\{S_{\bar{y}}\}_{\bar{y} \in \mathcal{Y}})\|_1 \\
&= \|\mathbf{M}^{-1}\|_\infty d_{TV}(P_{\bar{Y}|X}, Q'_{\bar{Y}|X}), \tag{5}
\end{aligned}$$

where  $P(\cdot|\{S_y\}) = [P(Y = 1|S_1), \dots, P(Y = K|S_K)]^\top$ ,  $P(\cdot|\{S_{\bar{y}}\}) = [P(\bar{Y} = 1|S_1), \dots, P(\bar{Y} = K|S_K)]^\top$ , (a) follows from  $P(\cdot|\{S_{\bar{y}}\}) = \mathbf{M}P(\cdot|\{S_y\})$ , and (b) follows from the fact that  $\mathbf{1}^\top Ax \leq \|Ax\|_1 \leq \|A\|_1 \|x\|_1$ . By combining (4) and (5), we have

$$\begin{aligned}
d_{TV}(P_{XY}, Q_{XY}) &\leq c_1 d_{TV}(P_X, Q_X) + c_2 \|\mathbf{M}^{-1}\|_\infty d_{TV}(P_{\bar{Y}|X}, Q'_{\bar{Y}|X}) \\
&\quad + c_2 d_{TV}(Q_{Y|X}, Q'_{Y|X}) \tag{6}
\end{aligned}$$

According to the relations between total variation (TV), KL divergence ( $d_{KL}$ ), and Jensen-Shannon divergence ( $d_{JS}$ ), we can rewrite (6) as

$$\begin{aligned}
d_{TV}(P_{XY}, Q_{XY}) &\leq 2c_1 \sqrt{d_{JS}(P_X, Q_X)} + c_2 \|\mathbf{M}^{-1}\|_\infty \sqrt{d_{KL}(P_{\bar{Y}|X}, Q'_{\bar{Y}|X})} \\
&\quad + c_2 \sqrt{d_{KL}(Q_{Y|X}, Q'_{Y|X})}, \tag{7}
\end{aligned}$$

which follows from the Pinsker's inequality. By replacing  $2c_1$  in (7) with a new constant  $c_1$  (using the same notation for simplicity), we can obtain the inequality in Theorem 1. From the theorem, we can see that if the complementary labels are highly-biased, it may cause  $\mathbf{M}$  to be rank-deficient. In this case, our algorithm may not minimize the distance between  $P_{XY}$  and  $Q_{XY}$  efficiently.

## S2. Illustration of Our Objective Function (Eq. (5))

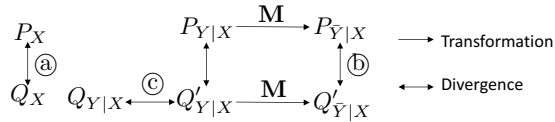

Figure 1: Illustration of the divergence terms that are minimized in Eq. (5).  $P_{Y|X}$  ( $P_{\bar{Y}|X}$ ) is the conditional distribution of ordinal (complementary) label given features on the real data.  $Q'_{Y|X}$  ( $Q'_{\bar{Y}|X}$ ) is the conditional distribution of ordinal (complementary) label produced by the classification network  $C$  in Eq. (5).  $Q_{Y|X}$  is the conditional distribution of ordinal label given features induced by our generator  $G$ . From the figure, we can see that minimizing (b) leads to reduced divergence between  $P_{Y|X}$  and  $Q'_{Y|X}$ . Therefore, the objective function minimizes the divergence between  $P_{Y|X}$  and  $Q_{Y|X}$  further because of (c). Combined with (a), our objective minimizes divergence between  $P_{XY}$  and  $Q_{XY}$ .

### S3. Quality of synthetic data

| Method \ $r_l$      | 0.2               | 0.4               | 0.6               | 0.8               | 1.0               |
|---------------------|-------------------|-------------------|-------------------|-------------------|-------------------|
| CIFAR10             |                   |                   |                   |                   |                   |
| Ordinary label, IS  | $5.16 \pm 0.066$  | $5.99 \pm 0.058$  | $6.19 \pm 0.070$  | $6.27 \pm 0.070$  | $6.53 \pm 0.082$  |
| CCGAN, IS           | $5.28 \pm 0.048$  | $5.90 \pm 0.065$  | $6.27 \pm 0.094$  | $6.27 \pm 0.067$  | $6.48 \pm 0.052$  |
| Ordinary label, FID | 54.33             | 39.18             | 35.18             | 32.91             | 28.40             |
| CCGAN, FID          | 50.75             | 37.47             | 33.86             | 34.55             | 31.63             |
| CIFAR100            |                   |                   |                   |                   |                   |
| Ordinary label, IS  | $5.11 \pm 0.038$  | $6.80 \pm 0.084$  | $7.59 \pm 0.154$  | $7.94 \pm 0.133$  | $7.82 \pm 0.09$   |
| CCGAN, IS           | $4.80 \pm 0.042$  | $6.36 \pm 0.059$  | $6.73 \pm 0.095$  | $7.17 \pm 0.085$  | $7.22 \pm 0.115$  |
| Ordinary label, FID | 65.00             | 44.14             | 41.49             | 36.25             | 34.34             |
| CCGAN, FID          | 79.13             | 44.01             | 43.63             | 36.21             | 34.63             |
| VGGFACE100          |                   |                   |                   |                   |                   |
| Ordinary label, IS  | $19.18 \pm 0.254$ | $29.19 \pm 0.235$ | $48.99 \pm 0.533$ | $54.59 \pm 0.390$ | $67.77 \pm 0.568$ |
| CCGAN, IS           | $16.49 \pm 0.243$ | $28.10 \pm 0.368$ | $45.82 \pm 0.746$ | $52.97 \pm 0.470$ | $62.30 \pm 0.409$ |
| Ordinary label, FID | 100.48            | 66.00             | 42.98             | 38.07             | 26.26             |
| CCGAN, FID          | 113.78            | 59.98             | 36.45             | 31.661            | 27.79             |

Table 1: This table shows the Inception Score and FID score on CIFAR10, CIFAR100 and VGGFACE100 dataset.  $r_l$  denotes the proportion of sampled labeled data for training from the training set  $S$ . All these scores are under the uniformed  $M$  setting.

### S4. More Generated Images

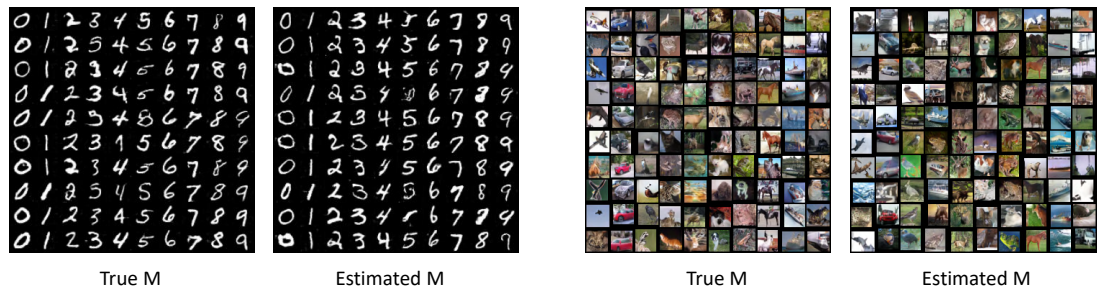

Figure 2: Synthetic results for MNIST and CIFAR10. We set  $r_l = 1$  here. It shows the generated data with true  $M$  and estimated  $M$

### References

- [Thekumparampil et al.2018] Thekumparampil, K. K.; Khetan, A.; Lin, Z.; and Oh, S. 2018. Robustness of conditional gans to noisy labels. In *Advances in Neural Information Processing Systems*, 10271–10282. 1

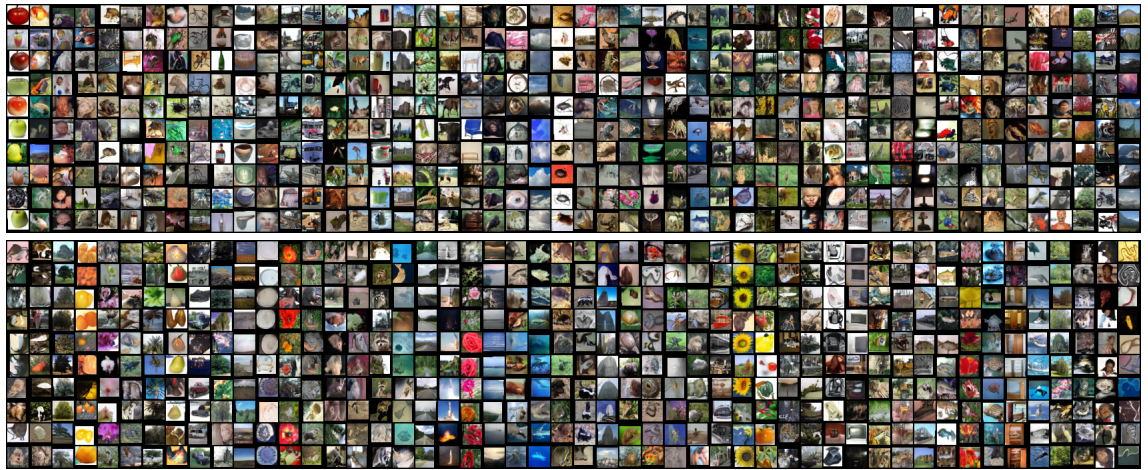

True  $M$

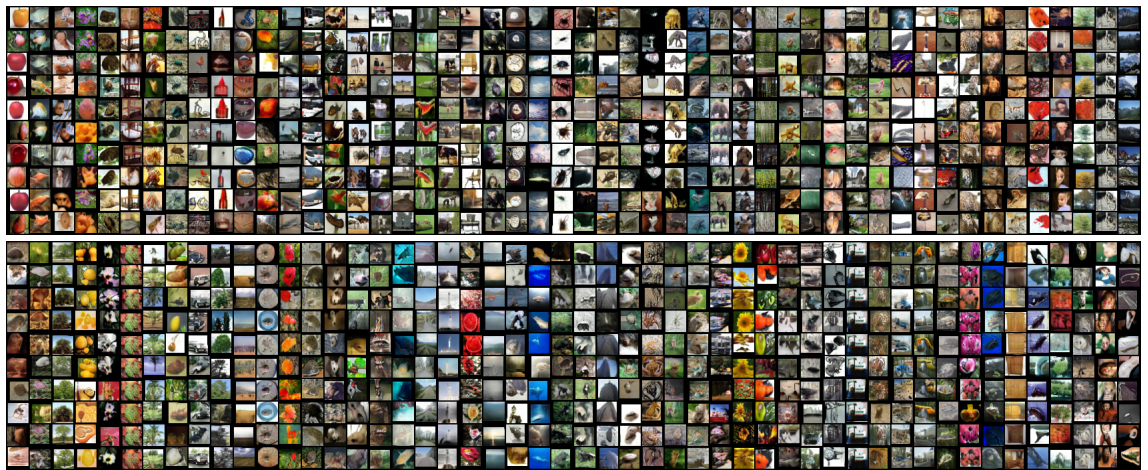

Estimated  $M$

Figure 3: Synthetic results for CIFAR100. We set  $r_l = 1$  here. It shows the generated data with true  $M$  and estimated  $\hat{M}$

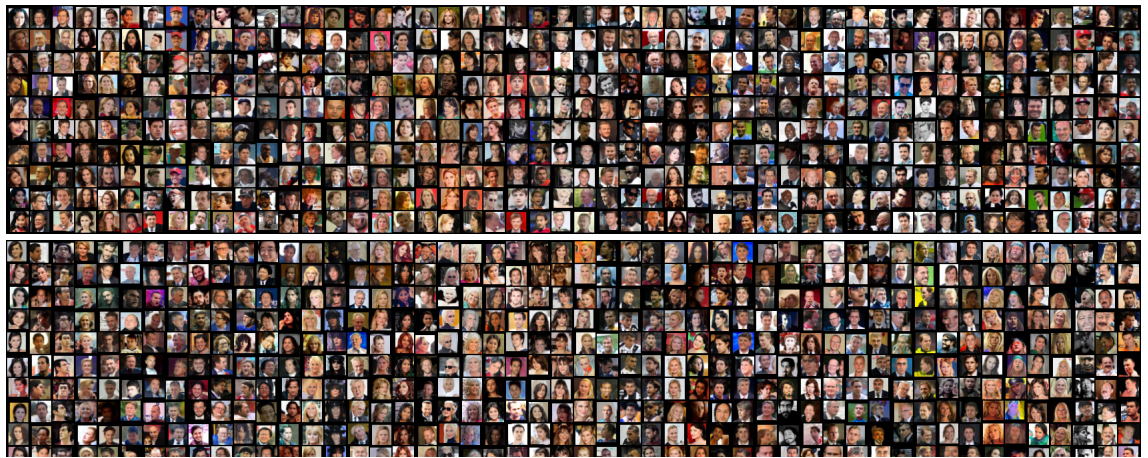

True M

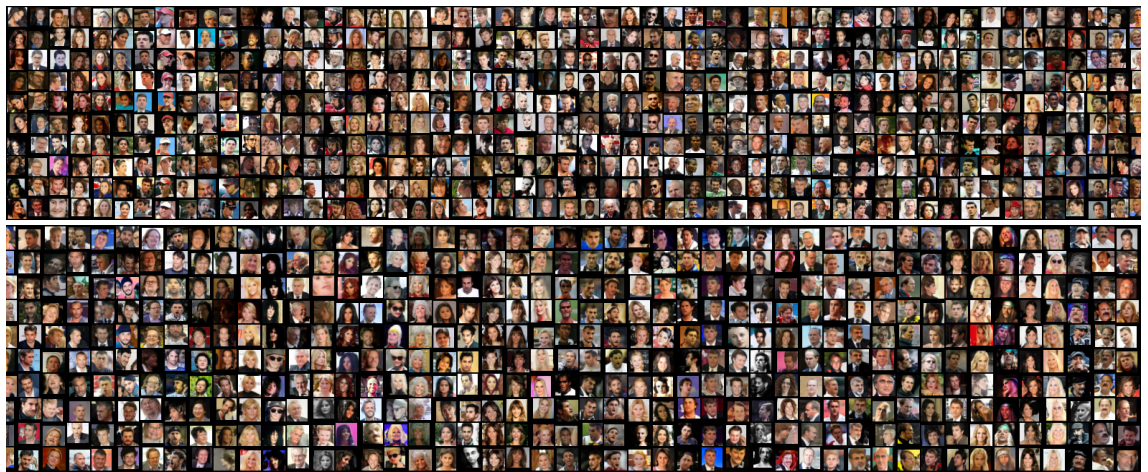

Estimated M

Figure 4: Synthetic results for MNIST and VGGFACE100. We set  $r_l = 1$  here. It shows the generated data with true  $M$  and esitimated  $M$
